# Supplementary material
Source: PubMed Central journal article supplement (PMC3583995)
Supplement: 706b66cd3a8ab17e51cd3b0c2ccd5607_genetics.112.147645-1.pdf [file 706b66cd3a8ab17e51cd3b0c2ccd5607_genetics.112.147645-1.pdf]

| chromosome     | strand   | from            | to              | mismatch  | gap      | spacer    |
|----------------|----------|-----------------|-----------------|-----------|----------|-----------|
| <b>chr5</b>    | <b>+</b> | <b>7477585</b>  | <b>7477635</b>  | <b>0</b>  | <b>0</b> | <b>15</b> |
| chr5           | +        | 28112014        | 28112249        | 10        | 2        | 198       |
| chr7           | -        | 17711418        | 17711581        | 10        | 1        | 127       |
| <b>chr9</b>    | <b>-</b> | <b>15931407</b> | <b>15931476</b> | <b>10</b> | <b>2</b> | <b>32</b> |
| chr12          | +        | 5685843         | 5685985         | 7         | 2        | 105       |
| chr12          | -        | 19269294        | 19269518        | 10        | 2        | 187       |
| chr13          | -        | 23653665        | 23654214        | 7         | 2        | 512       |
| chr16          | +        | 21165226        | 21165700        | 10        | 2        | 437       |
| scaffold693    | +        | 42746           | 43178           | 9         | 2        | 395       |
| scaffold791    | -        | 31456           | 31899           | 10        | 2        | 406       |
| ultracontig149 | -        | 166188          | 166675          | 6         | 2        | 450       |
| ultracontig62  | +        | 293467          | 293699          | 9         | 1        | 196       |
| ultracontig72  | -        | 2589715         | 2589917         | 10        | 1        | 166       |
| ultracontig88  | -        | 226571          | 227065          | 7         | 2        | 457       |

**Figure S1** Potential off-target site of DJ1-TALENs identified with the e-PCR program. This list shows candidate off-target sites identified as follow three conditions; (1) up to five non-identical bases (mismatches) in each recognition sequence, (2) up to one base pair gap in each recognition sequence, (3) <500 bp spacer length between the two putative recognition regions. Red letters indicate the target site of DJ1-TALENs. Blue letters indicate a potential off-target region analyzed in this study.

**Table S1 Oligonucleotides sequences used in this study**

| Name          | Sequence (5'-3')                           |
|---------------|--------------------------------------------|
| FokI-FW       | GTCAAAGTGAAGTGGAGGAG                       |
| latepA-RV-MCS | GCGCCGCGCCGCTAGCAGATCTTAAAAACCTCCACACCTC   |
| N287FW        | AGATTACGCTGCTCATGGTACCGATCCCATTTCGTCGCGCAG |
| N153FW        | TCATGGTACGCCCCGCGACGGCGTGCT                |
| TAL-R2        | GGCGACGAGGTGGTCGTTGG                       |
| C230RV        | CACTTTGACTAGTTGGGATCCATCCGGGAGGCCGCCCA     |
| C47RV         | TTGGGATCCGATCAATCCGGCGCGTGCGG              |
| M13-FW        | GTAAAACGACGGCCAGT                          |
| M13-RV        | GGAAACAGCTATGACCATG                        |
| DJ1-FW2       | TGTGACTGTAGCGGGTCTGA                       |
| DJ1-RV1       | GTGTGAACAACGCTGCATT                        |
| DJ1-off1-FW   | GCATGCCAGAATGTGCTT                         |
| DJ1-off1-RV   | GTTGCAAAGCAGTTGCAGAA                       |
